# Supplementary material for: Age-related morphometrical peculiarities of Lithuanian women’s primordial ovarian follicles
Source: Reprod Biol Endocrinol. 2018 Jul 14;16:66. doi: 10.1186/s12958-018-0384-4 (PMC6046099; doi:10.1186/s12958-018-0384-4)
Supplement: Supplementary file 1 — Table S1. Morphometrical parameters of primordial ovarian follicles in 15–46 year old women described in the Figs. 2 and 3 (mean ± SD). (XLS 34 kb) [file 12958_2018_384_MOESM1_ESM.xls]

## Sheet: Sheet1
Table S1 Morphometrical parameters of primordial ovarian follicles in 15-46 year old women described in the Figures 2 and 3 (mean±SD)
Parameter	15-20 years old	21-25 years old	26-30 years old	31-35 years old	36-40 years old	41-46 years old	p values
Follicles
Diameter, µm	43.55±0.44 a	44.56±0.34 b	44.63±0.36 c	44.72±0.38 d	43.81±0.56 e	43.54±0.46 f	a:b, a:c, a:d, b:e, b:f, c:e, c:f, d:e, d:f, p<0.05
Area, µm2	1487.8±32.14 a	1557.05±23.59 b	1562.4±24.84 c	1569.2±28.32 d	1506.3±41.3 e	1487.9±36.84 f	a:b, a:c, a:d, b:e, b:f, c:e, c:f, d:e, d:f, p<0.05
Oocytes
Diameter, µm	38.22±0.39 a	39.38±0.34 b	39.45±0.32 c	39.55±0.45 d	38.45±0.35 e	38.35±0.41 f	a:b, a:c, a:d, b:e, b:f, c:e, c:f, d:e, d:f, p<0.05
Area, µm2	1145.55±25.75 a	1215.85±20.82 b	1220.2±19.57 c	1226.75±29.67d	1159.55±22.91 e	1153.25±26.71 f	a:b, a:c, a:d, b:e, b:f, c:e, c:f, d:e, d:f, p<0.05
Oocytes nuclei
Diameter, µm	15.49±0.2 a	15.54±0.15 b	15.59±0.14 c	15.31±0.39 d	14.67±0.42 e	14.67±0.5 f	a:e, a:f, b:e, b:f, c:e, c:f, d:e, d:f, p<0.05
Area, µm2	187.16±4.84 a	188.51±3.66 b	189.55±3.57 c	183.07±11.57 d	173.99±11.38 e	168.19±13.23 f	a:e, a:f, b:d, b:e, b:f, c:d, c:e, c:f, d:e, d:f, e:f, p<0.05
